# Supplementary material
Source: publisher figshare collection journal article supplement (https://acs.figshare.com/ndownloader/files/8725684)
Supplement: Supplementary file 1 [file 8725684]

## Supporting Information

### **A novel multiblock copolymer of CO<sub>2</sub>-based PPC-*mb*-PBS: from simulation to experiment**

Jiaxiang Qin,<sup>1§</sup> Weikeng Luo,<sup>1§</sup> Meng Li,<sup>2</sup> Pin Chen,<sup>3</sup> Shuanjin Wang,<sup>1</sup> Shan Ren,<sup>1</sup>  
Dongmei Han<sup>1</sup>, Min Xiao<sup>1\*</sup>, and Yuezhong Meng<sup>1\*</sup>

- 1) *State Key Laboratory of Optoelectronic Materials and Technologies/ The Key Laboratory of Low-carbon Chemistry & Energy Conservation of Guangdong Province, Sun Yat-sen University, No. 135, Xingang Xi Road, Guangzhou, 510275, P. R. China*
- 2) *Department of Applied Chemistry, School of Science, Xi'an Jiaotong University, No.28, Xianning West Road, Xi'an, Shaanxi, 710049, P.R. China*
- 3) *National Supercomputer Centre in Guangzhou, No. 132, Waihuan Dong Road, Guangzhou, 510006, P.R. China*

*\*Correspondence authors.*

*E-mail: mengyzh@mail.sysu.edu.cn; stsxm@mail.sysu.edu.cn*

**5 pages, 2 schemes, 5 figures and 1 table**

**Measurement:**

$^1\text{H}$ -NMR spectra of the polyesters were recorded on a Bruker DRX-500 NMR spectrometer at room temperature. Deuterated chloroform ( $\text{CDCl}_3$ ) was used as solvent, chemical shifts were expressed in ppm with respect to tetramethylsilane (TMS). Diffusion ordered spectroscopy (DOSY) experiments were performed with a Bruker DRX-600 NMR spectrometer operating at 600 MHz, using  $\text{CDCl}_3$  as solvent. Number-average molecular mass ( $M_n$ ) and polydispersity index (PDI) of the resultant polymer product were measured using a gel permeation chromatography (GPC) system (Waters 515 HPLC Pump, Waters 2414 detector) with a set of three columns (Waters Styragel 500, 10,000, and 100,000 Å) and chloroform (HPLC grade) as eluent. The GPC system was calibrated by a series of poly-styrene standards with polydispersities of 1.02 standards. The glass transition temperature ( $T_g$ ) of the copolymers was measured by a DSC (Netzsch Model 204) and the measurements were carried out under nitrogen flow from  $-70$  to  $180$  °C at a heating rate of  $5$  °C/min.  $T_g$  of the samples was determined from the second run. The tensile tests were performed using a temperature-controlled tensile tester (New SANS, Shenzhen, China) at  $0$  and  $25$  °C with a crosshead speed of  $50$  mm/min. Five specimens of each sample were tested, and the average results were recorded.

**Film preparation:**

Prior to measurements of mechanical properties, the film samples of PPC, PBS and PPC-*mb*-PBSs copolymers (thickness  $\sim 0.2$  mm) were obtained by solution-cast method. The polyester was dissolved in chloroform (10 wt %) and then cast on a polytetrafluoroethylene (PTFE) dish, followed by evaporation of solvent at  $25$  °C for 24 h. The films were further dried at  $40$  °C in vacuum for 24 h.

**Scheme S1** Schematic Diagram of Synthesis of PBS-*mb*-PPC by coupling reaction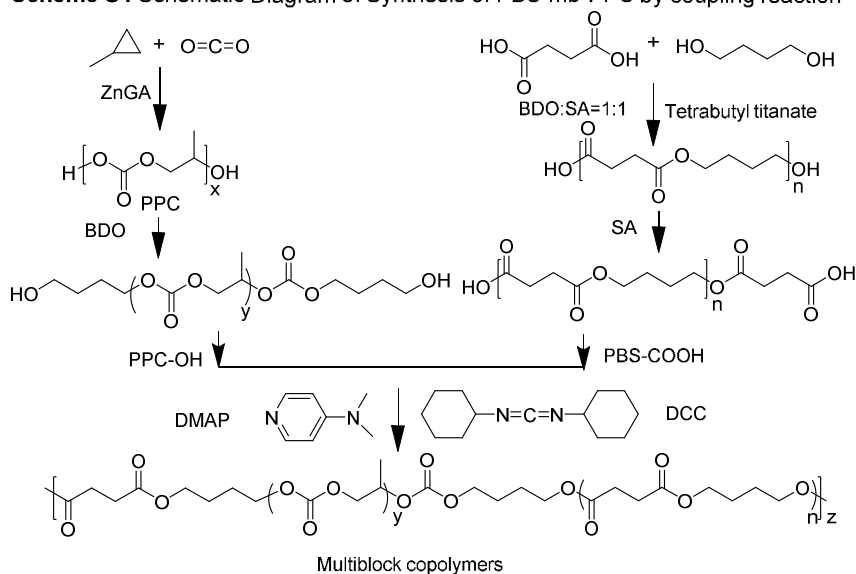

$$\text{PBS-COOH} + \text{Cyclohexyl-N=N-Cyclohexyl} \longrightarrow \text{Cyclohexyl-N=N-Cyclohexyl-PBS-COO}^-$$

$$\text{PBS-CO-PPC} + \text{Cyclohexyl-NH-C(=O)-NH-Cyclohexyl} \longleftarrow \text{Cyclohexyl-NH-C(=O)-O-PBS-CO-PPC-OH}$$

$$\text{PBS-COOH} = \text{HO}-(\text{CH}_2)_2-\text{C}(=\text{O})-\text{CH}_2-\text{C}(=\text{O})-\text{O}-(\text{CH}_2)_6-\text{O}-(\text{CH}_2)_2-\text{C}(=\text{O})-\text{CH}_2-\text{C}(=\text{O})-\text{OH}$$

$$\text{PPC-OH} = \text{HO}-(\text{CH}_2)_6-\text{O}-(\text{CH}_2)_2-\text{C}(=\text{O})-\text{O}-(\text{CH}_2)_2-\text{C}(=\text{O})-\text{O}-(\text{CH}_2)_6-\text{OH}$$

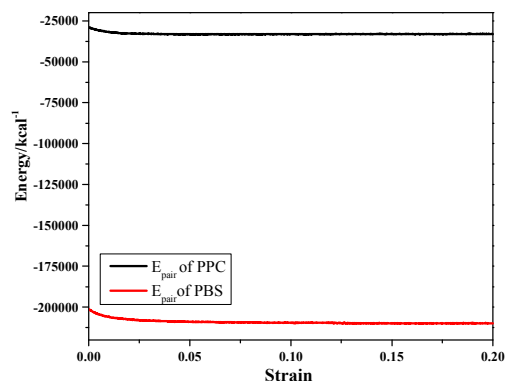

$E_{\text{pair}}$  = Pairwise energy ( $E_{\text{vdwl}} + E_{\text{coul}} + E_{\text{long}}$ ),  $E_{\text{vdwl}}$  = Vander Waal pairwise energy (includes etail),  $E_{\text{coul}}$  = Coulombic pairwise energy,  $E_{\text{long}}$  = Long-range kspace energy

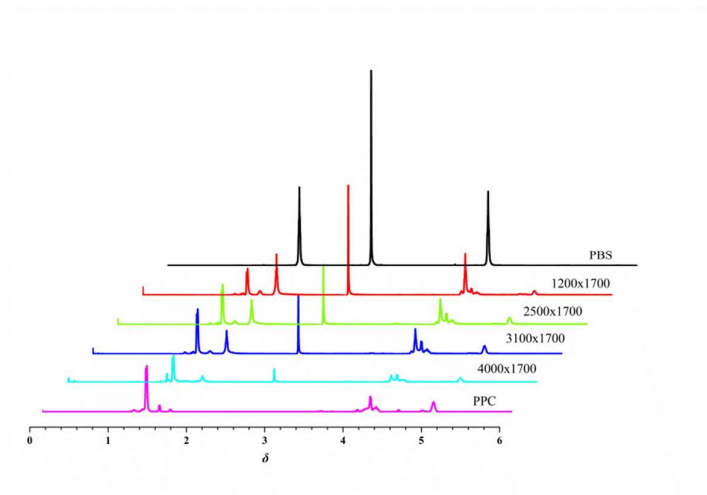

**Fig. S2**  $^1\text{H}$ -NMR spectra of PPC-mb-PBS copolyester:  $\delta(\text{PC}, \text{CH})=5.0$ ,  $\delta(\text{BS}, \text{CH}_2)=2.7$

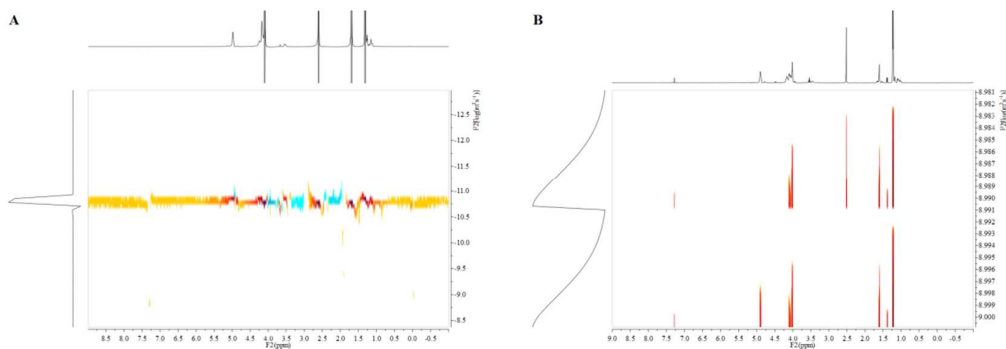

Fig. S3 DOSY spectrum of copolyester : (A) PPC-mb-PBS; (B) Mixture of PPC-OH and PBS-COOH

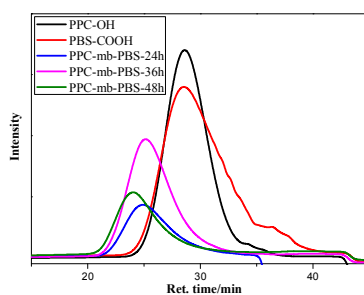

Fig. S4 GPC analysis of PPC-OH, PBS-COOH and multiblock copolymer

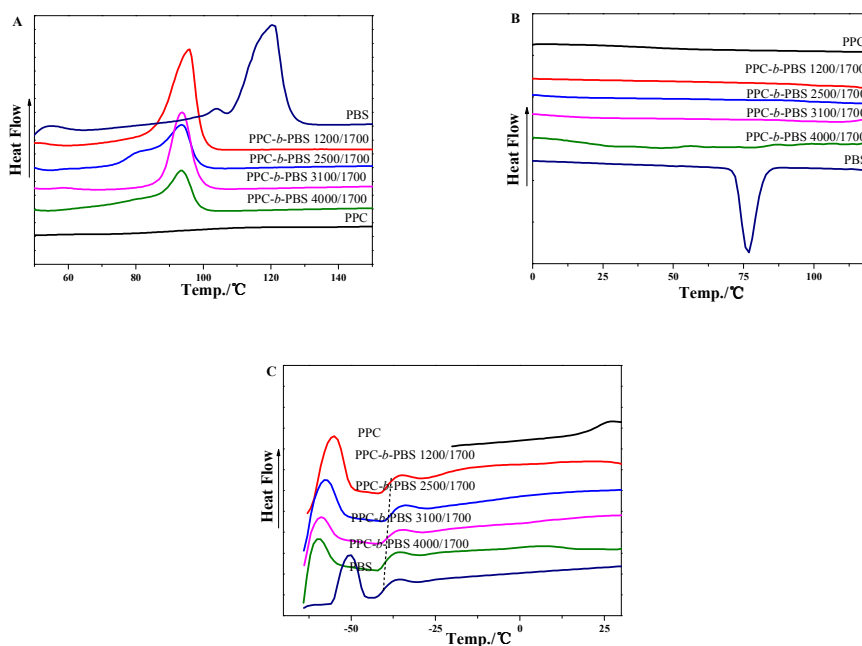

Fig. S5 DSC curves of PPC, PBS and PPC-*mb*-PBS: (A) first heating runs (B) cooling runs; (C) second heating runs

Tab. S1 Comparison of experimental results with calculation datas from simulations of different block sizes

| Block length<br>(PPC-b-PBS) | $T_g^a/^\circ\text{C}$ | $T_g^b/^\circ\text{C}$ | Deviation rate/% |
|-----------------------------|------------------------|------------------------|------------------|
| PBS                         | -40.2                  | -42.0                  | 4.5              |
| 1200/1700                   | -38.2                  | -39.1                  | 2.3              |
| 2700/1700                   | -42.5                  | -38.1                  | 11.5             |
| 3100/1700                   | -41.4                  | -39.0                  | 6.2              |
| 4000/1700                   | -40.9                  | -39.9                  | 2.5              |
| PPC                         | -22.3                  | 23.2                   | 4.0              |

<sup>a</sup> Measured by DSC. <sup>b</sup> Calculated by molecular dynamic simulation.
